# Supplementary material
Source: Springer Nature journal article supplement (https://www.springermedizin.de/resource/supplementary/12871_2013_348_MOESM1_ESM.pdf/9429080)
Supplement: MOESM1 [file 9429080]

Standardised early warning system (SEWS) scores allocated for each clinical observation (adapted from [1]).

| Parameter                                            | Score        |         |         |         |         |         |      |
|------------------------------------------------------|--------------|---------|---------|---------|---------|---------|------|
|                                                      | 3            | 2       | 1       | 0       | 1       | 2       | 3    |
| Respiratory rate (breaths/min)                       | ≤8           |         |         | 9-20    | 21-30   | 31-35   | ≥36  |
| Oxygen saturation (%)                                | <85          | 85-89   | 90-92   | ≥93     |         |         |      |
| Temperature (°C)                                     | <34          | 34-34.9 | 35-35.9 | 36-37.9 | 38-38.4 | ≥38.5   |      |
| Systolic blood pressure (mmHg)                       | ≤69          | 70-79   | 80-99   | 100-199 |         | ≥200    |      |
| Heart rate (beats/min)                               | ≤29          | 30-39   | 40-49   | 50-99   | 100-109 | 110-129 | ≥130 |
| AVPU response (stimulus required to induce response) | Unresponsive | Pain    | Verbal  | Alert   |         |         |      |

Case example; a patient has respiratory rate = 26, oxygen saturation = 94%, temperature = 38.4, blood pressure = 84/62, heart rate = 107, and is alert, therefore SEWS = 4. The action required in response to the SEWS score is detailed on the charts and ranges from “Continue routine observation” with SEWS = 0, to “Call appropriate Registrar for immediate review” with SEWS ≥ 6. SEWS = 4 mandates immediate involvement of the nurse in charge and medical assessment within 20 minutes.

1. Paterson R, MacLeod DC, Thetford D, Beattie A, Graham C, Lam S, Bell D: **Prediction of in-hospital mortality and length of stay using an early warning scoring system: clinical audit.** *Clin Med* 2006, **6**(3):281-284.
